# Supplementary material
Source: ML conference proceedings conference paper supplement (https://openreview.net/forum?id=WpuBEtrn0t)
Supplement: supplementary_material [file attachment]

## 1 Appendix

2 The following manuscript provides the supplementary materials of the main paper: Regularizing  
3 Neural Networks with Meta-Learning Generative Models.

## 4 A Algorithm of Meta Generative Regularization

---

### Algorithm 1 Meta Generative Regularization

---

**Require:** Training dataset  $\mathcal{D}$ , validation dataset  $\mathcal{D}_{\text{val}}$ , main model  $f_\theta$ , generator  $G$ , finder  $F_\phi$ , training batchsize  $B$ , pseudo batchsize  $B_p$ , validation batchsize  $B_{\text{val}}$ , step size  $\eta$  and  $\xi$ , hyperparameter  $\lambda$  and  $\lambda_{\text{KL}}$ .

**Ensure:** Trained main model  $f_\theta$

```

1: while not converged do
2:    $\{(x^i, y^i)\}_{i=1}^B \sim \mathcal{D}$ 
3:    $\{z^i\}_{i=1}^{B_p} \sim \mathcal{N}(0, I)$ 
4:   // Updating  $\phi$  for MPS
5:    $\{(x_{\text{val}}^i, y_{\text{val}}^i)\}_{i=1}^{B_{\text{val}}} \sim \mathcal{D}$ 
6:    $\{x_p^i\}_{i=1}^{B_p} = \{G_\Phi(F_\phi(z^i), y_p^i)\}_{i=1}^{B_p}$ 
7:    $\theta' \leftarrow \theta - \eta \nabla_\theta (\frac{1}{B} \ell(f_\theta(x^i), y^i) + \frac{\lambda}{B_p} \ell_{\text{PCR}}(x_p^i; \psi))$ 
8:    $\phi \leftarrow \phi - \xi \nabla_\phi (\frac{1}{B_{\text{val}}} \ell(f_{\theta'}(x_{\text{val}}), y_{\text{val}}) + \lambda_{\text{KL}}(D_{\text{KL}}(p_\phi(z) \| p(z))))$ 
9:   // Updating  $\theta$  with PCR
10:   $\{x_p^i\}_{i=1}^{B_p} = \{G_\Phi(F_\phi(z^i), y_p^i)\}_{i=1}^{B_p}$ 
11:   $\theta \leftarrow \theta - \eta \nabla_\theta (\frac{1}{B} \ell(f_\theta(x^i), y^i) + \frac{\lambda}{B_p} \ell_{\text{PCR}}(x_p^i; \psi))$ 
12: end while

```

---

## 5 B Additional Experiments

### 6 B.1 Evaluation of Gradient Approximation

7 Here, we evaluate the gradient approximation by Eq. (9). As shown in Table 1, the 1st-order  
8 approximation by Eq. (9) well approximated the second-order gradients in speeding up over 10%  
with 0.08 of the accuracy drop.

Table 1: Performance comparison between MPS with 2nd-order gradients and 1st-order approximated gradients (ResNet-18, Cars).

| Method            | Top-1 Acc. (%)  | Wall Clock Time (hours) |
|-------------------|-----------------|-------------------------|
| 2nd-Order         | 87.30 $\pm$ .39 | 6.55                    |
| 1st-Order Approx. | 87.22 $\pm$ .15 | 5.79                    |

9

### 10 B.2 Ablation study of $F_\phi$

11 In Section 3.2, we introduce  $F_\phi$  for meta-optimized parameters and the residual architectures with  
12 MLP defined by Eq. (10). We performed an ablation study of MPS with respect to the meta-optimized  
13 parameters and the architectures of  $F_\phi$ . We compared MPS with a variant of MPS optimizing  $G_\Phi$   
14 instead of  $F_\phi$ . We also attempted other architectures for  $F_\phi$  including **Linear**:  $W_\phi(z) + b$ , **MLP**:  
15  $\text{MLP}_\phi(z)$ , and **Residual+Shallow**:  $z + \tanh(W_\phi(z) + b)$ . The results of these variations are shown  
16 in Table 2. We observed that MPS with  $G_\Phi$  caused failures of training  $f_\theta$  and degrades the accuracy.  
17 On the other hand, all variants of MPS with  $F_\phi$  succeeded in boosting the models without MPS.  
18 Thus, restricting the number of optimized parameters is important, and determining an optimal  $z$  with  
19 the finder  $F_\phi$  is effective on the optimization problems of MPS. For the variants of MPS with  $F_\phi$ ,  
20 we observed that the residual architectures and regularization by  $D_{\text{KL}}(p_\phi(z) \| p(z))$  contributed to  
21 the successes. Interestingly, MPS with Linear  $F_\phi$  outperformed MPS with MLP  $F_\phi$ , i.e., significantly  
22 transforming the input  $z \sim p(z)$  by complex functions results in low accuracy. These results suggest

that better latent vectors in  $\mathcal{Z}$  to train  $f_\theta$  can exist near the uniformly sampled input  $z$ . Thus, limiting the search range by  $\tanh$  in the residual architectures can help in finding better latent vectors.

Table 2: Ablation study of MPS (ResNet-18, Cars).1

| Method                                   | Top-1 Acc. (%)                  |
|------------------------------------------|---------------------------------|
| Without MPS (PCR)                        | 86.32 $\pm$ .07                 |
| MPS                                      | <b>87.22<math>\pm</math>.15</b> |
| MPS with $G_\phi$                        | 84.47 $\pm$ .05                 |
| MPS with Linear $F_\phi$                 | 86.51 $\pm$ .09                 |
| MPS with MLP $F_\phi$                    | 86.35 $\pm$ .13                 |
| MPS with Residual+Shallow $F_\phi$       | 86.88 $\pm$ .16                 |
| MPS w/o $D_{\text{KL}}(p_\phi(z)  p(z))$ | 86.92 $\pm$ .22                 |

### B.3 MGR with Diffusion Models

We tested our method on EDM [1], a recent diffusion model. Due to the computation cost, we used a 10% reduced CIFAR-10 as the dataset. We optimized  $F_\phi$  to search the first step noise of the diffusion process. Table 3 shows that our method with EDM improves Base Model. However, the overhead of incorporating diffusion models was significant; it takes more than ten times longer training than GANs. In future work, we will investigate lighter-weight methods using the diffusion model.

Table 3: Performance studies on Diffusion Model (ResNet-18 on Cars)

| Method     | Top-1 Acc. (%)                  |
|------------|---------------------------------|
| Base Model | 86.49 $\pm$ .48                 |
| GDA (EDM)  | 85.80 $\pm$ .30                 |
| MGR        | <b>88.49<math>\pm</math>.12</b> |

### B.4 Updating $F_\phi$ without Meta-optimization

MPS consists of meta-learning on validation losses requiring bi-level optimization, which is a relatively heavy computation. One can consider if  $F_\phi$  could be trained without meta-optimization. Here, we try alternative methods other than meta-learning to update  $F_\phi$ . Instead of meta-learning, we used a strategy of choosing hard examples via optimizing  $F_\phi$ . That is, we optimize  $F_\phi$  by maximizing the training cross-entropy (CE) loss and the PCR loss on synthetic samples. Note that, in both cases, we used the PCR loss for synthetic samples when training classifiers. Table 4 shows the results. Optimizing  $F_\phi$  with CE and PCR slightly improved the baselines but significantly underperformed our method (MGR). This result can justify using meta-optimizing  $F_\phi$  to generate useful samples for classifiers. Nevertheless, this idea could inspire a sampling method that does not require bi-level optimization in future work.

Table 4: Performance comparison of updating strategies for  $F_\phi$  (ResNet-18 on Cars)

| Method                     | Top-1 Acc. (%)                  |
|----------------------------|---------------------------------|
| Base Model                 | 85.50 $\pm$ .10                 |
| PCR                        | 86.36 $\pm$ .08                 |
| Optimizing $F_\phi$ w/ CE  | 86.52 $\pm$ .21                 |
| Optimizing $F_\phi$ w/ PCR | 86.44 $\pm$ .68                 |
| MGR                        | <b>87.22<math>\pm</math>.15</b> |

## 42 **References**

- 43 [1] Tero Karras, Miika Aittala, Timo Aila, and Samuli Laine. Elucidating the design space of  
44 diffusion-based generative models. In *Advances in Neural Information Processing Systems*, 2022.
